# Supplementary material for: Support for phosphoinositol 3 kinase and mTOR inhibitors as treatment for lupus using in-silico drug-repurposing analysis
Source: Springer Nature journal article supplement (doi:10.1186/s13075-017-1263-7), 2017-03-11

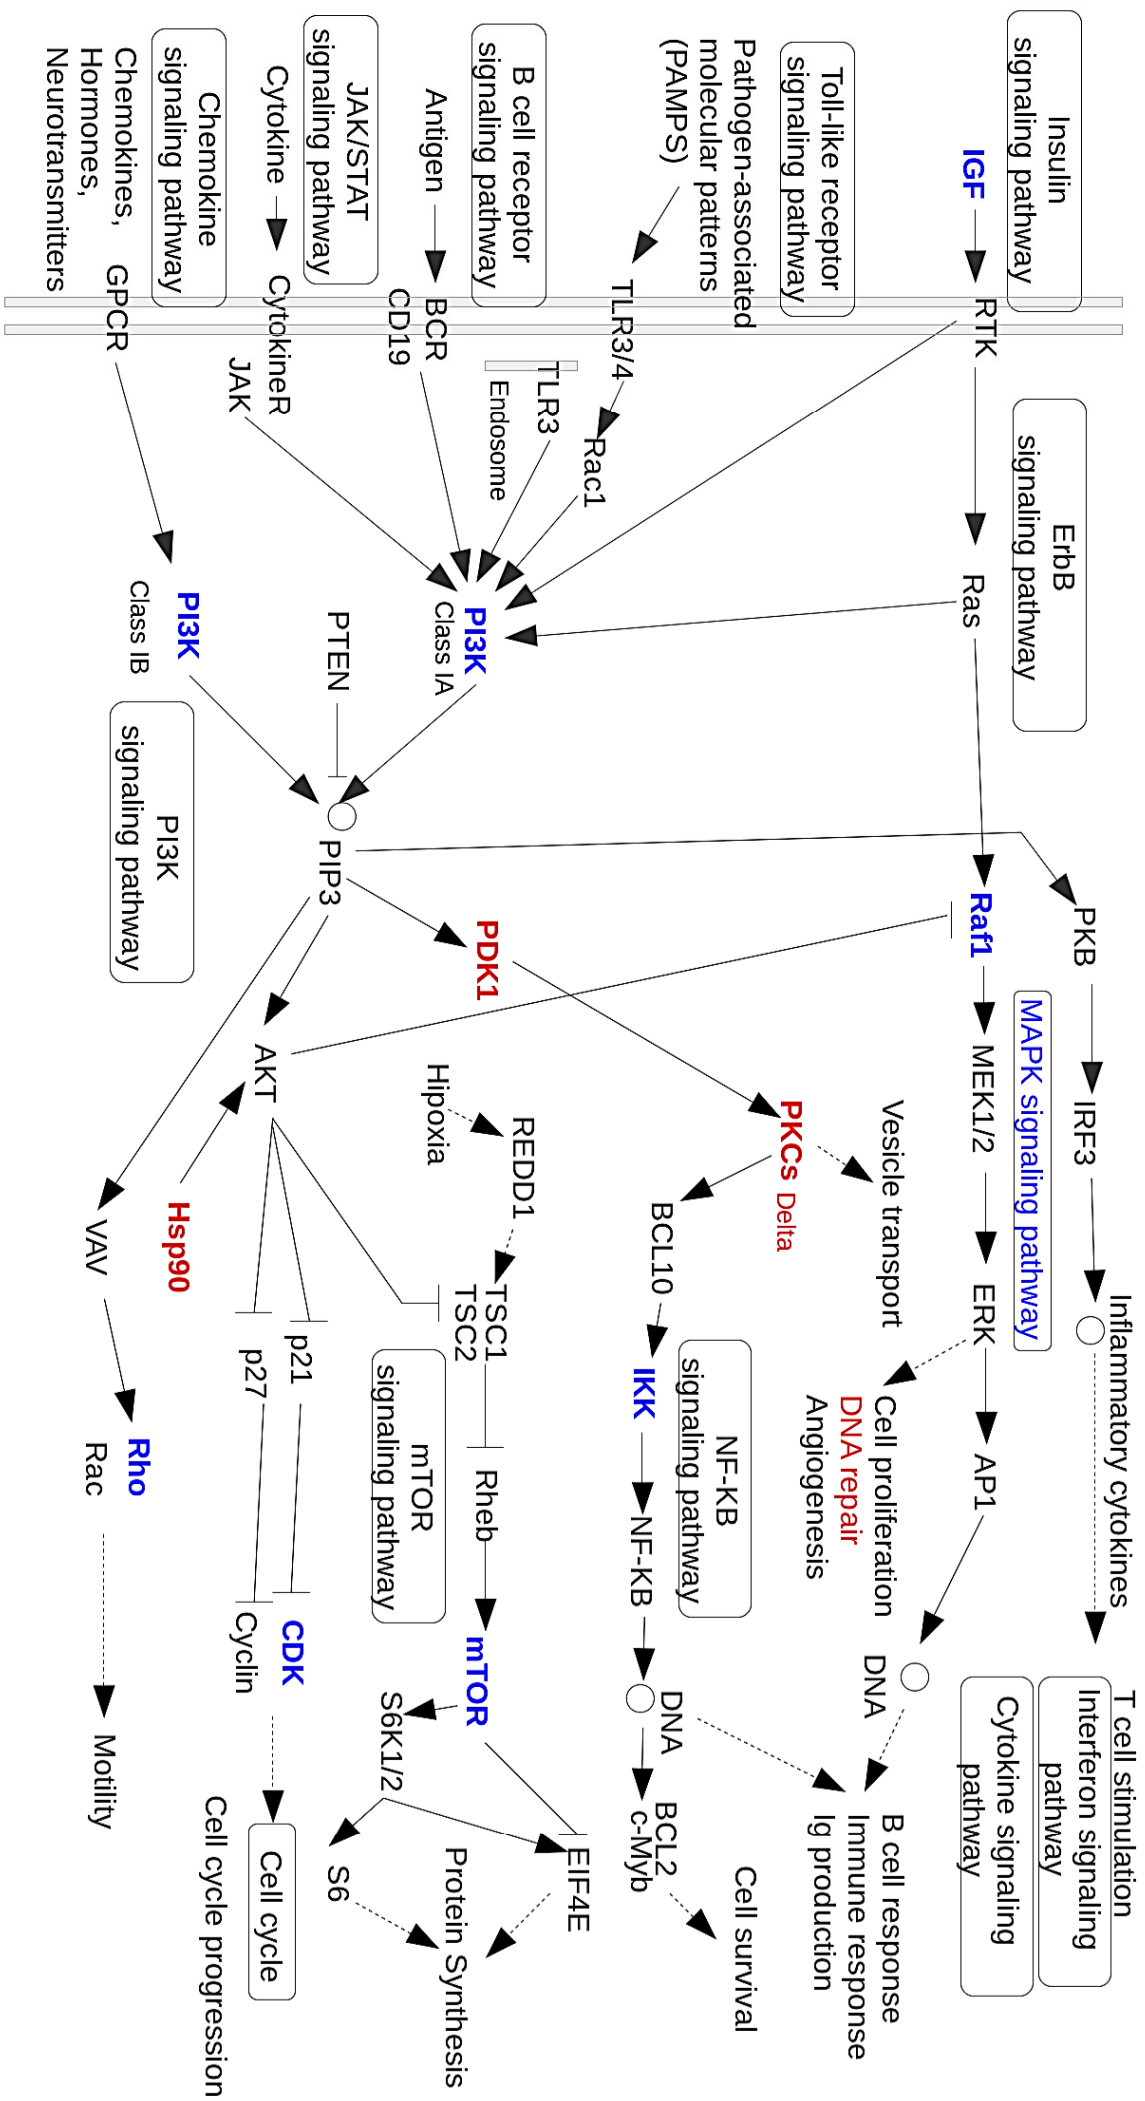

Supplement: MOESM2 [file 12135474]
